# Supplementary material for: Knowledge about tuberculosis transmission and prevention and perceptions of health service utilization among index cases and contacts in Brazil: Understanding losses in the latent tuberculosis cascade of care
Source: PLoS One. 2017 Sep 21;12(9):e0184061. doi: 10.1371/journal.pone.0184061 (PMC5608201; doi:10.1371/journal.pone.0184061)
Supplement: S2 Table — (XLSX) [file pone.0184061.s002.xlsx]

## Sheet: Questões- 3 cidades
CITY	MANAUS?	RIO DE JANEIRO?	RECIFE?	END TIME	START TIME	INTERVIEW DURATION TIME (IN MINUTES)	7- AGE	8- SEX	9- MARITAL STATUS	10-YEARS OF STUDY	11- MORE OR LESS THAN 4 YEARS OF STUDY	12- SCHOLARITY (≤ 4 years= 1; >4 years=2)	13- DO YOU HAVE HEALTH INSURANCE?	14- WHAT IS YOUR OCCUPATION?	15- ARE YOU EMPLOYED AT THE MOMENT?	16.0 - WHAT'S YOUR MONTHLY INCOME?	16.1 - WHAT IS THE INCOME OF OTHER PEOPLE WHO LIVE WITH YOU?	16.2- FAMILY INCOME (BRL) - R$)	16.3- FAMILY INCOME (USD) - BASED ON BASED ON THE AVERAGE EXCHANGETAXES IN THE YEAR 2015)	16.4- INCOME (USD/DAY/PERSON)	16.5- FAMILY INCOME CLASSIFICATION	16.6- FAMILY INCOME: <1=(1); 1-2 =(2); >2 = (3)	17- HOW MANY PEOPLE LIVE IN THE SAME HOME INCLUDING YOU?	18- HAVE YOU NEEDED TO STOP WORKING FOR TUBERCULOSIS? (9999 = Not applicable for those unemployed)	19- If yes, for how many months? (9999 = Not applicable for those unemployed)	20- Do you think you can transmit tuberculosis to someone else?	20.1- Do you think you can transmit tuberculosis to someone else? (SATISFACTORY ANSWER)	21- DO YOU THINK YOU CAN DIE FOR TUBERCULOSIS?	21- DO YOU THINK YOU CAN DIE FOR TUBERCULOSIS? (SATISFACTORY ANSWER)	21- DO YOU THINK THAT TUBERCULOSIS HAS A CURE?	21- DO YOU THINK THAT TUBERCULOSIS HAS A CURE? (SATISFACTORY ANSWER)	22- HOW CAN TB BE TREATED? - WITH MEDICINES	22- HOW CAN TB BE TREATED? - CONSUMING HEALTHY FOOD	22- HOW CAN TB BE TREATED? - WITH A HEALTHY LIFESTYLE	22- HOW CAN TB BE TREATED? - RESTING	22- HOW CAN TB BE TREATED? - WITH A PROPER FOLLOW UP WITH THE DOCTOR	22- HOW CAN TB BE TREATED? - OTHERS	22- HOW CAN TB BE TREATED? - WITH ADEQUATE HYGIENE ACTIONS	22- HOW CAN TB BE TREATED? - I DON'T KNOW	22- HOW CAN TB BE TREATED? - PERFORMING SMEAR TEST	22- HOW CAN TB BE TREATED? PROPERLY ANSWERED	22- HOW CAN TB BE TREATED? EXCLUDENT ANSWER	22- HOW CAN TB BE TREATED? SATISFACTORY ANSWER	23- WHAT CAN HAPPEN IF YOU STOP TAKING THE MEDICATION? TB BACILLUS WILL GROW STRONGER	23- WHAT CAN HAPPEN IF YOU STOP TAKING THE MEDICATION? I WILL NOT BE CURED	23- WHAT CAN HAPPEN IF YOU STOP TAKING THE MEDICATION? NOTHING WILL HAPPEN IF I'M FEELING WELL.	23- WHAT CAN HAPPEN IF YOU STOP TAKING THE MEDICATION? I WILL DIE	23- WHAT CAN HAPPEN IF YOU STOP TAKING THE MEDICATION? I DON'T KNOW	23- WHAT CAN HAPPEN IF YOU STOP TAKING THE MEDICATION? I WILL HAVE ADVERSE REACTIONS
Manaus	yes	no	no	09:25:00	09:14:00	11	17	male	single	9	> 4 years	2	yes	student	no	0	3000	3000	900.63	10.007	> 2 USD/month	3	3	9999	9999	yes	yes	yes	yes	yes	yes	yes	no	no	no	no	no	no	no	no	yes	no	satisfactory	no	no	no	no	yes	no
Manaus	yes	no	no	09:52:00	09:45:00	7	54	male	single	0	≤ 4 years	1	no	janitor	no	0	0	0	0	0	< 1 USD/month	1	0	9999	9999	I don't know	no	I don't know	no	I don't know	no	yes	no	no	no	no	no	no	no	no	yes	no	satisfactory	no	no	no	no	yes	no
Manaus	yes	no	no	10:15:00	10:00:00	15	65	male	married	4	≤ 4 years	1	no	carpenter	no	1560	1560	3120	936.656	6.24437	> 2 USD/month	3	5	9999	9999	yes	yes	no	no	yes	yes	yes	no	no	no	no	no	no	no	no	yes	no	satisfactory	no	yes	no	no	no	no
Manaus	yes	no	no	09:17:00	09:08:00	9	46	female	married	12	> 4 years	2	no	housewife	no	167.56	300	467.56	140.366	2.33944	> 2 USD/month	3	2	9999	9999	yes	yes	yes	yes	yes	yes	yes	no	no	no	no	no	no	no	no	yes	no	satisfactory	yes	no	no	no	no	no
Manaus	yes	no	no	09:30:00	09:15:00	15	36	female	single	10	> 4 years	2	no	housewife	no	0	788	788	236.566	1.5771	1-2 USD/month	2	5	9999	9999	yes	yes	yes	yes	yes	yes	yes	no	no	no	no	no	no	no	no	yes	no	satisfactory	yes	yes	no	yes	no	no
Manaus	yes	no	no	09:48:00	09:41:00	7	33	male	single	12	> 4 years	2	yes	industrial worker	no	1200	1200	2400	720.504	8.0056	> 2 USD/month	3	3	yes	5	yes	yes	yes	yes	yes	yes	yes	yes	no	no	no	no	no	no	no	yes	no	satisfactory	yes	yes	no	no	no	no
Manaus	yes	no	no	10:47:00	10:15:00	32	59	female	single	8	> 4 years	2	no	janitor	no	800	2800	3600	1080.76	3.27502	> 2 USD/month	3	11	9999	9999	yes	yes	yes	yes	yes	yes	yes	yes	no	no	no	no	no	no	no	yes	no	satisfactory	no	yes	no	no	no	no
Manaus	yes	no	no	11:00:00	10:52:00	8	34	female	widowed	2	≤ 4 years	1	no	housewife	no	0	418	418	125.488	0.597561	< 1 USD/month	1	7	9999	9999	yes	yes	yes	yes	yes	yes	yes	yes	no	no	no	no	no	no	no	yes	no	satisfactory	no	no	no	no	yes	no
Manaus	yes	no	no	07:53:00	07:40:00	13	48	male	separeted	12	> 4 years	2	no	retired	no	1269	788	2057	617.532	6.86147	> 2 USD/month	3	3	9999	9999	I don't know	no	yes	yes	yes	yes	yes	yes	no	no	no	no	no	no	no	yes	no	satisfactory	yes	no	no	no	no	no
Manaus	yes	no	no	08:18:00	08:04:00	14	55	female	separeted	6	> 4 years	2	no	freelancer	no	300	600	900	270.189	1.28661	1-2 USD/month	2	7	yes	16	yes	yes	yes	yes	yes	yes	yes	no	no	no	no	no	no	no	no	yes	no	satisfactory	yes	yes	no	no	no	no
Manaus	yes	no	no	08:53:00	08:30:00	23	31	female	single	12	> 4 years	2	yes	industrial worker	no	788	788	1576	473.131	1.97138	1-2 USD/month	2	8	yes	3	no	no	yes	yes	yes	yes	yes	no	no	no	yes	no	no	no	no	yes	no	satisfactory	no	yes	no	no	no	no
Manaus	yes	no	no	09:20:00	08:45:00	35	35	female	married	4	≤ 4 years	1	no	housewife	no	0	2500	2500	750.525	6.25438	> 2 USD/month	3	4	9999	9999	yes	yes	yes	yes	yes	yes	yes	no	no	no	no	no	no	no	no	yes	no	satisfactory	yes	yes	no	no	no	no
Manaus	yes	no	no	09:04:00	08:56:00	8	52	male	single	5	> 4 years	2	no	security guard	no	0	0	0	0	0	< 1 USD/month	1	1	yes	7	yes	yes	yes	yes	yes	yes	yes	no	no	no	no	no	no	no	no	yes	no	satisfactory	yes	no	no	no	no	no
Manaus	yes	no	no	08:44:00	08:35:00	9	27	male	single	11	> 4 years	2	no	garbageman	yes	830	3168	3998	1200.24	8.0016	> 2 USD/month	3	5	no	9999	I don't know	no	yes	yes	yes	yes	yes	no	no	no	no	no	no	no	no	yes	no	satisfactory	yes	yes	no	no	no	no
Manaus	yes	no	no	09:16:00	09:10:00	6	17	female	single	11	> 4 years	2	no	student	no	200	1576	1776	533.173	4.44311	> 2 USD/month	3	4	9999	9999	yes	yes	no	no	yes	yes	yes	no	no	no	no	no	no	no	no	yes	no	satisfactory	yes	yes	no	no	no	no
Manaus	yes	no	no	10:16:00	10:00:00	16	22	male	single	12	> 4 years	2	no	interpreter	no	0	788	788	236.566	1.5771	1-2 USD/month	2	5	9999	9999	no	no	yes	yes	yes	yes	yes	no	no	no	no	no	no	no	no	yes	no	satisfactory	no	yes	no	no	no	no
Manaus	yes	no	no	11:10:00	11:01:00	9	56	male	married	4	≤ 4 years	1	no	electrician	no	2500	7500	10000	3002.1	10.007	> 2 USD/month	3	10	9999	9999	yes	yes	no	no	yes	yes	no	no	no	no	no	no	no	yes	no	no	yes	unsatisfactory	no	yes	no	no	no	no
Manaus	yes	no	no	09:18:00	09:08:00	10	60	female	married	1	≤ 4 years	1	no	housewife	no	1800	1576	3376	1013.51	16.8918	> 2 USD/month	3	2	9999	9999	yes	yes	yes	yes	yes	yes	yes	no	no	no	no	no	no	no	no	yes	no	satisfactory	no	yes	no	yes	no	no
Manaus	yes	no	no	09:41:00	09:25:00	16	21	male	single	6	> 4 years	2	no	bricklayer	no	0	2364	2364	709.697	3.94276	> 2 USD/month	3	6	yes	2	I don't know	no	I don't know	no	yes	yes	no	no	yes	no	no	no	no	no	no	no	no	unsatisfactory	yes	no	no	no	no	no
Manaus	yes	no	no	09:59:00	09:52:00	7	29	male	single	13	> 4 years	2	no	secretary	yes	1000	3940	4940	1483.04	16.4782	> 2 USD/month	3	3	yes	4	no	no	yes	yes	yes	yes	yes	no	yes	no	no	no	no	no	no	yes	no	satisfactory	no	yes	no	no	no	no
Manaus	yes	no	no	08:22:00	08:08:00	14	64	female	widowed	6	> 4 years	2	no	housewife	no	788	788	1576	473.131	1.97138	1-2 USD/month	2	8	9999	9999	yes	yes	yes	yes	yes	yes	yes	no	no	no	no	no	no	no	no	yes	no	satisfactory	yes	yes	no	yes	no	no
Manaus	yes	no	no	08:38:00	08:29:00	9	30	male	married	12	> 4 years	2	yes	industrial worker	no	0	5000	5000	1501.05	8.33917	> 2 USD/month	3	6	yes	2	no	no	yes	yes	yes	yes	yes	no	no	no	no	no	no	no	no	yes	no	satisfactory	yes	yes	no	no	no	no
Manaus	yes	no	no	10:15:00	10:01:00	14	37	female	married	5	> 4 years	2	no	kitchen assistant	no	290	0	290	87.0609	0.414576	< 1 USD/month	1	7	yes	9	yes	yes	yes	yes	yes	yes	yes	no	no	no	no	no	no	no	no	yes	no	satisfactory	yes	no	no	no	no	no
Manaus	yes	no	no	10:59:00	10:35:00	24	59	male	married	9	> 4 years	2	no	freelancer	no	1500	1500	3000	900.63	3.75263	> 2 USD/month	3	8	yes	1	yes	yes	no	no	yes	yes	yes	no	no	no	no	no	no	no	no	yes	no	satisfactory	no	yes	no	no	no	no
Manaus	yes	no	no	08:19:00	08:08:00	11	24	female	single	9	> 4 years	2	no	housewife	no	0	8748	8748	2626.24	17.5083	> 2 USD/month	3	5	9999	9999	yes	yes	yes	yes	I don't know	no	yes	no	no	no	yes	no	no	no	no	yes	no	satisfactory	yes	yes	no	no	no	no
Manaus	yes	no	no	08:35:00	08:26:00	9	31	male	single	6	> 4 years	2	no	no profession	no	778	3000	3778	1134.19	7.56129	> 2 USD/month	3	5	9999	9999	yes	yes	yes	yes	yes	yes	yes	no	no	no	no	no	no	no	no	yes	no	satisfactory	yes	no	no	yes	no	no
Manaus	yes	no	no	09:04:00	09:00:00	4	45	male	single	3	≤ 4 years	1	no	traveler	no	0	1000	1000	300.21	1.66783	1-2 USD/month	2	6	9999	9999	no	no	no	no	yes	yes	yes	no	no	no	no	no	no	no	no	yes	no	satisfactory	no	no	no	no	yes	no
Manaus	yes	no	no	09:14:00	09:07:00	7	35	male	single	12	> 4 years	2	no	salesman	yes	1000	5000	6000	1801.26	20.014	> 2 USD/month	3	3	no	9999	no	no	yes	yes	yes	yes	yes	no	no	no	no	no	no	no	no	yes	no	satisfactory	yes	no	no	yes	no	no
Manaus	yes	no	no	07:52:00	07:47:00	5	21	male	single	12	> 4 years	2	no	no profession	no	852	0	852	255.779	0.94733	< 1 USD/month	1	9	9999	9999	yes	yes	yes	yes	yes	yes	no	no	no	no	no	no	no	yes	no	no	yes	unsatisfactory	yes	no	no	no	no	no
Manaus	yes	no	no	08:32:00	07:57:00	35	61	male	single	20	> 4 years	2	yes	public agent	yes	15000	15000	30000	9006.3	300.21	> 2 USD/month	3	1	no	9999	yes	yes	no	no	yes	yes	yes	no	no	no	no	no	no	no	no	yes	no	satisfactory	yes	no	no	yes	no	no
Manaus	yes	no	no	09:02:00	08:58:00	4	57	male	single	12	> 4 years	2	yes	merchant	no	0	0	0	0	0	< 1 USD/month	1	4	yes	6	no	no	no	no	yes	yes	yes	no	no	no	no	no	no	no	no	yes	no	satisfactory	yes	no	no	no	no	no
Manaus	yes	no	no	10:01:00	09:39:00	22	61	male	married	12	> 4 years	2	yes	public agent	no	3500	3500	7000	2101.47	35.0245	> 2 USD/month	3	2	yes	9	yes	yes	yes	yes	yes	yes	yes	yes	no	no	no	no	no	no	no	yes	no	satisfactory	no	no	no	no	no	no
Manaus	yes	no	no	10:13:00	09:25:00	48	66	male	single	10	> 4 years	2	no	carpenter	no	0	500	500	150.105	2.50175	> 2 USD/month	3	2	yes	2	yes	yes	yes	yes	yes	yes	yes	yes	no	no	no	no	no	no	no	yes	no	satisfactory	yes	yes	no	no	no	no
Manaus	yes	no	no	08:20:00	08:04:00	16	67	female	single	0	≤ 4 years	1	no	no profession	no	720	550	1270	381.267	1.27089	1-2 USD/month	2	10	9999	9999	I don't know	no	yes	yes	yes	yes	no	no	yes	yes	no	no	no	no	no	no	no	unsatisfactory	yes	no	no	no	no	no
Manaus	yes	no	no	08:32:00	08:27:00	5	26	male	married	12	> 4 years	2	no	driver	no	0	2300	2300	690.483	5.75403	> 2 USD/month	3	4	9999	9999	yes	yes	yes	yes	yes	yes	yes	no	no	no	no	no	no	no	no	yes	no	satisfactory	yes	no	no	no	no	no
Manaus	yes	no	no	09:01:00	08:54:00	7	59	female	single	12	> 4 years	2	yes	public agent	no	7000	26000	33000	9906.93	82.5578	> 2 USD/month	3	4	9999	9999	I don't know	no	I don't know	no	yes	yes	yes	yes	no	no	no	no	yes	no	no	yes	yes	unsatisfactory	yes	no	no	yes	no	no
Manaus	yes	no	no	10:18:00	10:13:00	5	45	female	single	16	> 4 years	2	no	Nursing technician	yes	5000	0	5000	1501.05	50.035	> 2 USD/month	3	1	no	9999	yes	yes	yes	yes	yes	yes	yes	no	no	no	no	no	no	no	no	yes	no	satisfactory	yes	no	no	no	no	no
Manaus	yes	no	no	08:32:00	08:26:00	6	89	female	widowed	0	≤ 4 years	1	no	housekeeper	no	787	787	1574	472.531	3.93776	> 2 USD/month	3	4	9999	9999	I don't know	no	no	no	yes	yes	yes	no	no	no	no	no	no	no	no	yes	no	satisfactory	no	no	no	yes	no	no
Manaus	yes	no	no	08:47:00	08:37:00	10	71	female	single	1	≤ 4 years	1	no	seamstress	no	788	788	1576	473.131	7.88552	> 2 USD/month	3	2	9999	9999	no	no	yes	yes	yes	yes	no	no	no	no	no	no	no	yes	no	no	yes	unsatisfactory	yes	no	no	no	no	no
Manaus	yes	no	no	09:46:00	09:40:00	6	56	male	single	1	≤ 4 years	1	yes	no profession	no	788	1800	2588	776.944	2.58981	> 2 USD/month	3	10	9999	9999	I don't know	no	no	no	yes	yes	yes	no	no	no	no	no	no	no	no	yes	no	satisfactory	yes	no	no	no	no	no
Manaus	yes	no	no	07:59:00	07:55:00	4	33	female	single	9	> 4 years	2	no	housekeeper	no	260	0	260	78.0546	0.650455	< 1 USD/month	1	4	9999	9999	yes	yes	yes	yes	yes	yes	yes	no	no	no	no	no	no	no	no	yes	no	satisfactory	no	yes	no	no	no	no
Manaus	yes	no	no	08:34:00	08:12:00	22	39	male	widowed	8	> 4 years	2	no	cook	no	0	788	788	236.566	1.5771	1-2 USD/month	2	5	9999	9999	yes	yes	yes	yes	yes	yes	yes	no	no	no	no	no	no	no	no	yes	no	satisfactory	yes	yes	no	no	no	no
Manaus	yes	no	no	07:45:00	07:30:00	15	51	male	single	4	≤ 4 years	1	no	hodman	yes	788	788	1576	473.131	15.771	> 2 USD/month	3	1	no	9999	yes	yes	yes	yes	yes	yes	yes	no	no	no	no	no	no	no	no	yes	no	satisfactory	yes	no	no	no	no	no
Manaus	yes	no	no	08:25:00	08:12:00	13	25	female	single	11	> 4 years	2	no	no profession	no	0	1000	1000	300.21	0.76977	< 1 USD/month	1	13	9999	9999	yes	yes	yes	yes	yes	yes	yes	no	no	no	no	no	no	no	no	yes	no	satisfactory	yes	no	no	no	no	no
Manaus	yes	no	no	08:20:00	08:10:00	10	39	female	single	4	≤ 4 years	1	no	housekeeper	no	788	300	1088	326.629	2.72191	> 2 USD/month	3	4	9999	9999	yes	yes	yes	yes	yes	yes	yes	no	no	no	no	no	no	no	no	yes	no	satisfactory	yes	no	no	yes	no	no
Manaus	yes	no	no	08:35:00	08:25:00	10	33	female	single	5	> 4 years	2	no	agriculturist	no	182	0	182	54.6382	0.364255	< 1 USD/month	1	5	9999	9999	yes	yes	yes	yes	yes	yes	yes	no	no	no	no	no	no	no	no	yes	no	satisfactory	yes	no	no	no	no	no
Manaus	yes	no	no	09:50:00	09:00:00	50	45	male	married	12	> 4 years	2	no	driver	yes	1570	1570	3140	942.66	15.711	> 2 USD/month	3	2	no	9999	yes	yes	yes	yes	yes	yes	yes	no	no	no	no	no	no	no	no	yes	no	satisfactory	yes	yes	no	no	no	no
Manaus	yes	no	no	09:10:00	09:03:00	7	42	female	single	13	> 4 years	2	no	hawk	no	0	0	0	0	0	< 1 USD/month	1	4	9999	9999	yes	yes	yes	yes	yes	yes	yes	no	no	no	no	no	no	no	no	yes	no	satisfactory	yes	no	no	no	no	no
Manaus	yes	no	no	09:25:00	09:15:00	10	35	male	single	13	> 4 years	2	no	restaurant supervisor	no	1300	788	2088	626.839	10.4473	> 2 USD/month	3	2	9999	9999	yes	yes	yes	yes	yes	yes	yes	no	no	no	no	no	no	no	no	yes	no	satisfactory	no	no	no	no	no	yes
Manaus	yes	no	no	07:50:00	07:35:00	15	27	female	married	8	> 4 years	2	no	student	no	194	500	694	208.346	2.31495	> 2 USD/month	3	3	9999	9999	yes	yes	yes	yes	yes	yes	yes	no	no	no	no	no	no	no	no	yes	no	satisfactory	no	no	no	no	no	no
Manaus	yes	no	no	10:23:00	10:00:00	23	28	female	married	6	> 4 years	2	no	housewife	no	0	0	0	0	0	< 1 USD/month	1	4	9999	9999	no	no	yes	yes	yes	yes	yes	no	no	no	no	no	no	no	no	yes	no	satisfactory	no	no	no	yes	no	no
Manaus	yes	no	no	10:54:00	10:30:00	24	51	male	married	5	> 4 years	2	no	bricklayer	no	260	5000	5260	1579.11	8.77281	> 2 USD/month	3	6	9999	9999	no	no	yes	yes	yes	yes	yes	no	no	no	yes	no	no	no	no	yes	no	satisfactory	no	yes	no	no	no	no
Manaus	yes	no	no	15:34:00	15:05:00	29	45	male	single	8	> 4 years	2	no	no profession	no	728	2184	2912	874.212	4.85673	> 2 USD/month	3	6	9999	9999	yes	yes	no	no	yes	yes	yes	no	no	no	no	no	no	no	no	yes	no	satisfactory	yes	yes	no	no	no	no
Manaus	yes	no	no	16:15:00	15:55:00	20	40	male	single	4	≤ 4 years	1	no	trash recycler	no	0	0	0	0	0	< 1 USD/month	1	0	9999	9999	yes	yes	yes	yes	yes	yes	yes	no	no	no	no	no	no	no	no	yes	no	satisfactory	no	no	no	yes	no	no
Manaus	yes	no	no	16:57:00	16:30:00	27	35	female	single	12	> 4 years	2	no	Nursing technician	no	728	2500	3228	969.078	8.07565	> 2 USD/month	3	4	yes	1	yes	yes	yes	yes	yes	yes	yes	no	no	no	no	no	no	no	no	yes	no	satisfactory	yes	no	no	no	no	no
Manaus	yes	no	no	14:13:00	13:50:00	23	56	male	married	8	> 4 years	2	no	bricklayer	yes	1500	2200	3700	1110.78	7.40518	> 2 USD/month	3	5	yes	1	yes	yes	yes	yes	yes	yes	yes	no	no	no	no	no	no	no	no	yes	no	satisfactory	no	yes	no	no	no	no
Manaus	yes	no	no	18:08:00	17:50:00	18	72	female	widowed	4	≤ 4 years	1	no	retired	no	720	3200	3920	1176.82	9.80686	> 2 USD/month	3	4	9999	9999	yes	yes	yes	yes	yes	yes	yes	yes	no	yes	no	no	no	no	no	yes	no	satisfactory	no	no	no	yes	no	no
Manaus	yes	no	no	17:21:00	17:05:00	16	23	male	married	10	> 4 years	2	no	trash recycler	no	1000	0	1000	300.21	3.33567	> 2 USD/month	3	3	yes	2	yes	yes	yes	yes	yes	yes	yes	no	no	yes	no	no	no	no	no	yes	no	satisfactory	no	no	no	yes	no	no
Manaus	yes	no	no	10:20:00	10:00:00	20	37	male	married	12	> 4 years	2	yes	Furniture assembler	no	800	1500	2300	690.483	7.67204	> 2 USD/month	3	3	yes	3	no	no	yes	yes	yes	yes	yes	no	no	no	no	no	no	no	no	yes	no	satisfactory	yes	no	no	yes	no	no
Manaus	yes	no	no	10:42:00	10:25:00	17	57	female	married	8	> 4 years	2	no	housewife	no	0	2000	2000	600.42	4.0028	> 2 USD/month	3	5	9999		yes	yes	yes	yes	yes	yes	yes	no	no	no	no	no	no	no	no	yes	no	satisfactory	no	no	no	yes	no	no
Manaus	yes	no	no	16:42:00	16:25:00	17	66	male	separeted	0	≤ 4 years	1	no	janitor	no	800	3000	3800	1140.8	9.50665	> 2 USD/month	3	4	no	9999	yes	yes	yes	yes	yes	yes	yes	no	no	no	no	no	no	no	no	yes	no	satisfactory	yes	no	no	no	no	no
RJ	no	yes	no	14:36:00	14:15:00	21	31	female	separeted	12	> 4 years	2	no	day care assistant	yes	1400	1400	2800	840.588	7.0049	> 2 USD/month	3	4	no	9999	I don't know	no	no	no	yes	yes	yes	yes	yes	no	yes	no	no	no	no	yes	no	satisfactory	no	yes	no	no	no	no
RJ	no	yes	no	16:14:00	15:55:00	19	28	female	married	9	> 4 years	2	no	Confectionery	no	800	800	1600	480.336	4.0028	> 2 USD/month	3	4	9999	9999	yes	yes	yes	yes	yes	yes	yes	yes	yes	no	no	yes	no	no	no	yes	no	satisfactory	yes	yes	no	yes	no	no
RJ	no	yes	no	16:25:00	16:05:00	20	35	female	single	12	> 4 years	2	no	nanny	no	0	3400	3400	1020.71	6.80476	> 2 USD/month	3	5	9999	9999	no	no	yes	yes	yes	yes	yes	yes	no	no	no	yes	no	no	no	yes	no	satisfactory	yes	no	no	yes	no	no
RJ	no	yes	no	10:15:00	09:55:00	20	43	male	separeted	12	> 4 years	2	no	driver	no	900	2000	2900	870.609	5.80406	> 2 USD/month	3	5	9999	9999	yes	yes	yes	yes	yes	yes	yes	no	no	no	no	no	no	no	no	yes	no	satisfactory	no	no	no	no	no	no
RJ	no	yes	no	11:00:00	10:45:00	15	37	female	married	6	> 4 years	2	no	housewife	no	65	965	1030	309.216	3.43574	> 2 USD/month	3	3	9999	9999	yes	yes	no	no	yes	yes	yes	yes	yes	no	no	no	no	no	no	yes	no	satisfactory	yes	yes	no	no	no	no
RJ	no	yes	no	11:20:00	11:05:00	15	40	male	married	9	> 4 years	2	no	security guard	yes	900	965	1865	559.892	6.22102	> 2 USD/month	3	3	yes	2	yes	yes	no	no	yes	yes	yes	yes	yes	no	yes	no	no	no	no	yes	no	satisfactory	yes	yes	no	no	no	no
RJ	no	yes	no	08:55:00	08:35:00	20	73	male	married	7	> 4 years	2	yes	industrial worker	no	850	1600	2450	735.515	12.2586	> 2 USD/month	3	2	9999	9999	yes	yes	no	no	yes	yes	yes	yes	yes	yes	yes	no	no	no	no	yes	no	satisfactory	yes	yes	no	no	no	no
RJ	no	yes	no	09:45:00	09:35:00	10	36	female	single	12	> 4 years	2	no	telemarketing operator	yes	1500	5000	6500	1951.37	13.0091	> 2 USD/month	3	5	no	9999	no	no	yes	yes	yes	yes	yes	no	no	no	no	no	no	no	no	yes	no	satisfactory	yes	no	no	no	no	no
RJ	no	yes	no	10:20:00	10:10:00	10	42	male	separeted	9	> 4 years	2	no	bricklayer	yes	2000	2000	4000	1200.84	40.028	> 2 USD/month	3	1	no	9999	no	no	no	no	yes	yes	yes	no	no	yes	no	no	no	no	no	yes	no	satisfactory	yes	no	no	no	no	no
RJ	no	yes	no	10:45:00	10:35:00	10	41	female	separeted	12	> 4 years	2	no	seamstress	no	900	900	1800	540.378	18.0126	> 2 USD/month	3	1	9999	9999	yes	yes	yes	yes	yes	yes	yes	yes	no	no	no	no	no	no	no	yes	no	satisfactory	no	yes	no	no	no	no
RJ	no	yes	no	11:00:00	10:45:00	15	27	female	single	12	> 4 years	2	no	clerk	yes	900	900	1800	540.378	18.0126	> 2 USD/month	3	1	yes	8888	yes	yes	no	no	yes	yes	yes	yes	yes	yes	yes	no	no	no	no	yes	no	satisfactory	yes	yes	no	no	no	no
RJ	no	yes	no	11:20:00	11:10:00	10	30	female	married	12	> 4 years	2	no	salesman	no	866	2000	2866	860.402	7.17002	> 2 USD/month	3	4	9999	9999	no	no	no	no	yes	yes	yes	yes	yes	yes	yes	no	no	no	no	yes	no	satisfactory	no	yes	no	no	no	no
RJ	no	yes	no	11:40:00	11:35:00	5	38	male	married	12	> 4 years	2	no	car keeper	no	1800	3000	4800	1441.01	12.0084	> 2 USD/month	3	4	yes	8888	yes	yes	yes	yes	yes	yes	yes	yes	no	no	no	no	no	no	no	yes	no	satisfactory	no	no	no	no	no	no
RJ	no	yes	no	10:05:00	10:00:00	5	61	male	single	8	> 4 years	2	no	Unemployed	no	0	0	0	0	0	< 1 USD/month	1	1	9999	9999	yes	yes	yes	yes	yes	yes	yes	no	no	no	no	no	no	no	no	yes	no	satisfactory	yes	no	no	yes	no	no
RJ	no	yes	no	10:20:00	10:15:00	5	72	male	married	4	≤ 4 years	1	yes	doorman	yes	1300	1300	2600	780.546	6.50455	> 2 USD/month	3	4	no	9999	yes	yes	yes	yes	yes	yes	yes	yes	no	no	no	no	no	no	no	yes	no	satisfactory	yes	no	no	no	no	no
RJ	no	yes	no	11:00:00	10:50:00	10	52	male	married	9	> 4 years	2	no	sailor	no	0	4500	4500	1350.95	45.0315	> 2 USD/month	3	1	9999	9999	yes	yes	I don't know	no	yes	yes	yes	no	no	no	no	no	no	no	no	yes	no	satisfactory	yes	no	no	no	no	no
RJ	no	yes	no	11:10:00	11:05:00	5	30	male	married	8	> 4 years	2	no	Unemployed	no	0	9999	9999	3001.8	100.06	> 2 USD/month	3	1	9999	9999	yes	yes	yes	yes	yes	yes	yes	no	no	no	no	no	no	no	no	yes	no	satisfactory	yes	no	no	no	no	no
RJ	no	yes	no	11:25:00	11:15:00	10	53	male	single	8	> 4 years	2	no	janitor	yes	600	9999	10599	3181.93	106.064	> 2 USD/month	3	1	no	9999	yes	yes	yes	yes	no	no	yes	no	no	no	no	no	no	no	no	yes	no	satisfactory	no	no	no	yes	no	no
RJ	no	yes	no	11:50:00	11:45:00	5	40	female	single	5	> 4 years	2	no	housewife	no	1012	9999	11011	3305.61	36.729	> 2 USD/month	3	3	9999	9999	yes	yes	yes	yes	yes	yes	yes	no	no	no	no	no	no	no	no	yes	no	satisfactory	no	no	no	yes	no	no
RJ	no	yes	no	08:17:00	08:06:00	11	48	male	divorced	10	> 4 years	2	no	lapidary	no	1600	9999	11599	3482.14	116.071	> 2 USD/month	3	1	9999	9999	I don't know	no	yes	yes	yes	yes	yes	no	no	no	no	no	no	no	no	yes	no	satisfactory	yes	yes	no	no	no	no
RJ	no	yes	no	09:00:00	08:48:00	12	60	male	separeted	10	> 4 years	2	no	merchant	no	0	1000	1000	300.21	5.0035	> 2 USD/month	3	2	9999	9999	yes	yes	yes	yes	yes	yes	yes	no	no	no	no	no	no	no	no	yes	no	satisfactory	no	yes	no	no	no	no
RJ	no	yes	no	09:10:00	08:53:00	17	34	female	single	10	> 4 years	2	no	teacher	yes	3600	11500	15100	4533.17	37.7764	> 2 USD/month	3	4	no	9999	no	no	yes	yes	yes	yes	yes	no	no	yes	no	no	no	no	no	yes	no	satisfactory	no	no	no	yes	no	no
RJ	no	yes	no	09:25:00	09:15:00	10	39	male	married	7	> 4 years	2	no	security guard	no	1000	1400	2400	720.504	6.0042	> 2 USD/month	3	4	9999	9999	no	no	no	no	yes	yes	yes	no	no	no	no	no	no	no	no	yes	no	satisfactory	no	yes	no	no	no	no
RJ	no	yes	no	09:51:00	09:41:00	10	40	male	single	5	> 4 years	2	no	bricklayer	no	4000	4000	8000	2401.68	80.056	> 2 USD/month	3	1	9999	9999	yes	yes	yes	yes	yes	yes	yes	yes	yes	yes	no	yes	no	no	no	yes	no	satisfactory	no	no	no	yes	no	no
RJ	no	yes	no	10:34:00	10:25:00	9	22	male	married	8	> 4 years	2	no	Mensageiro	yes	1000	1000	2000	600.42	6.67134	> 2 USD/month	3	3	no	9999	yes	yes	yes	yes	yes	yes	yes	yes	no	no	no	no	no	no	no	yes	no	satisfactory	no	no	no	no	no	no
RJ	no	yes	no	10:38:00	10:32:00	6	57	male	separeted	4	≤ 4 years	1	no	garbageman	no	0	0	0	0	0	< 1 USD/month	1	1	9999	9999	yes	yes	yes	yes	yes	yes	yes	no	no	no	no	no	no	no	no	yes	no	satisfactory	no	yes	no	yes	no	no
RJ	no	yes	no	10:27:00	10:27:00	0	45	male	single	17	> 4 years	2	no	cook	yes	820	1200	2020	606.424	10.1071	> 2 USD/month	3	2	no	9999	yes	yes	yes	yes	yes	yes	yes	no	no	no	no	no	no	no	no	yes	no	satisfactory	no	yes	no	no	no	no
RJ	no	yes	no	09:46:00	09:40:00	6	40	female	married	17	> 4 years	2	no	teacher	no	0	2200	2200	660.462	5.50385	> 2 USD/month	3	4	9999	9999	yes	yes	yes	yes	yes	yes	yes	no	no	no	no	no	no	no	no	yes	no	satisfactory	no	yes	no	no	no	no
Recife	no	no	yes	15:05:00	14:55:00	10	33	female	married	12	> 4 years	2	no	no profession	no	70	0	70	21.0147	0.350245	< 1 USD/month	1	2	9999	9999	yes	yes	yes	yes	yes	yes	yes	no	no	no	no	no	no	no	no	yes	no	satisfactory	yes	yes	no	no	no	no
Recife	no	no	yes	15:22:00	15:10:00	12	51	female	separeted	19	> 4 years	2	no	housekeeper	no	0	500	500	150.105	0.454864	< 1 USD/month	1	11	yes	12	yes	yes	yes	yes	yes	yes	yes	no	no	no	no	no	no	no	no	yes	no	satisfactory	no	no	no	yes	no	no
Recife	no	no	yes	08:55:00	08:34:00	21	61	male	single	19	> 4 years	2	no	musician	no	3000	2500	5500	1651.16	27.5193	> 2 USD/month	3	2	yes	3	yes	yes	yes	yes	yes	yes	yes	no	no	no	yes	no	no	no	no	yes	no	satisfactory	yes	no	no	no	no	no
Recife	no	no	yes	14:40:00	14:26:00	14	30	female	married	10	> 4 years	2	no	janitor	yes	950	788	1738	521.765	4.34804	> 2 USD/month	3	4	no	9999	yes	yes	yes	yes	yes	yes	yes	no	no	no	yes	yes	no	no	yes	yes	yes	unsatisfactory	no	no	no	yes	no	no
Recife	no	no	yes	14:19:00	14:00:00	19	34	male	married	15	> 4 years	2	yes	computer Technician	yes	1500	3000	4500	1350.95	15.0105	> 2 USD/month	3	3	yes	1	no	no	yes	yes	yes	yes	yes	no	no	no	no	no	no	no	no	yes	no	satisfactory	yes	no	no	no	no	no
Recife	no	no	yes	09:05:00	08:55:00	10	29	male	married	9	> 4 years	2	no	freelancer	yes	900	0	900	270.189	4.50315	> 2 USD/month	3	2	yes	15	no	no	no	no	yes	yes	yes	no	no	no	no	no	no	no	no	yes	no	satisfactory	yes	yes	no	no	no	no
Recife	no	no	yes	14:20:00	14:15:00	5	27	female	single	25	> 4 years	2	yes	physician	yes	6000	6000	12000	3602.52	60.042	> 2 USD/month	3	2	no	9999	yes	yes	no	no	yes	yes	yes	no	no	no	no	no	no	no	no	yes	no	satisfactory	yes	no	no	no	no	no
Recife	no	no	yes	10:30:00	10:20:00	10	43	female	single	18	> 4 years	2	no	freelancer	no	0	0	0	0	0	< 1 USD/month	1	1	yes	1	no	no	no	no	yes	yes	yes	no	no	no	no	no	no	no	no	yes	no	satisfactory	no	no	no	yes	no	no
Recife	no	no	yes	11:10:00	11:05:00	5	34	male	single	11	> 4 years	2	no	gardener	yes	1000	0	1000	300.21	5.0035	> 2 USD/month	3	2	yes	1	yes	yes	yes	yes	yes	yes	yes	no	no	no	no	no	no	no	no	yes	no	satisfactory	yes	yes	no	no	no	no
Recife	no	no	yes	09:11:00	09:03:00	8	40	female	divorced	13	> 4 years	2	no	housewife	no	0	788	788	236.566	1.1265	1-2 USD/month	2	7	yes	3	yes	yes	yes	yes	yes	yes	yes	no	no	no	no	no	no	no	no	yes	no	satisfactory	no	no	no	yes	no	no
Recife	no	no	yes	09:42:00	09:34:00	8	40	female	married	38	> 4 years	2	no	Nursing technician	no	1200	0	1200	360.252	4.0028	> 2 USD/month	3	3	yes	36	no	no	yes	yes	yes	yes	yes	no	no	no	no	no	no	no	no	yes	no	satisfactory	no	no	no	yes	no	no
Recife	no	no	yes	10:48:00	10:30:00	18	47	female	single	8	> 4 years	2	no	housewife	no	0	300	300	90.063	0.750525	< 1 USD/month	1	4	yes	4	yes	yes	no	no	yes	yes	yes	no	no	no	no	no	no	no	no	yes	no	satisfactory	no	no	no	yes	no	no
Recife	no	no	yes	11:09:00	10:50:00	19	62	female	married	12	> 4 years	2	no	housewife	no	0	788	788	236.566	2.62851	> 2 USD/month	3	3	yes	2	no	no	no	no	yes	yes	yes	yes	no	no	no	no	no	no	no	yes	no	satisfactory	yes	no	no	yes	no	no
Recife	no	no	yes	11:18:00	11:12:00	6	47	male	single	28	> 4 years	2	no	hodman	no	0	788	788	236.566	3.94276	> 2 USD/month	3	2	yes	24	no	no	no	no	yes	yes	yes	no	no	no	no	no	no	no	no	yes	no	satisfactory	yes	no	no	no	no	no
Recife	no	no	yes	12:07:00	11:54:00	13	52	male	single	25	> 4 years	2	no	car painter	no	1300	3000	4300	1290.9	10.7575	> 2 USD/month	3	4	yes	7	yes	yes	yes	yes	yes	yes	yes	no	no	no	no	no	no	no	no	yes	no	satisfactory	no	yes	no	no	no	no
Recife	no	no	yes	09:40:00	09:22:00	18	41	male	single	20	> 4 years	2	no	eletronics technician	no	0	1200	1200	360.252	2.0014	1-2 USD/month	2	6	yes	2	yes	yes	yes	yes	yes	yes	yes	no	yes	no	no	no	no	no	no	yes	no	satisfactory	yes	no	no	no	no	no
Recife	no	no	yes	10:01:00	09:49:00	12	27	male	married	11	> 4 years	2	no	polisher	yes	1200	2800	4000	1200.84	13.3427	> 2 USD/month	3	3	yes	3	no	no	yes	yes	yes	yes	yes	no	no	no	no	no	no	no	no	yes	no	satisfactory	yes	no	no	no	no	no
Recife	no	no	yes	10:11:00	10:04:00	7	35	female	married	28	> 4 years	2	no	typist	no	0	3200	3200	960.672	8.0056	> 2 USD/month	3	4	yes	3	no	no	no	no	yes	yes	yes	no	no	no	no	no	no	no	no	yes	no	satisfactory	yes	no	no	no	no	no
Recife	no	no	yes	11:07:00	10:59:00	8	63	female	divorced	16	> 4 years	2	no	kitchen-maid	no	0	780	780	234.164	3.90273	> 2 USD/month	3	2	9999	9999	yes	yes	no	no	yes	yes	yes	yes	no	yes	yes	no	no	no	no	yes	no	satisfactory	yes	no	no	no	no	no
Recife	no	no	yes	11:16:00	11:10:00	6	22	male	single	18	> 4 years	2	no	student	no	150	1000	1150	345.242	1.43851	1-2 USD/month	2	8	9999	9999	yes	yes	no	no	yes	yes	yes	no	no	no	no	no	no	no	no	yes	no	satisfactory	yes	no	no	no	no	no
Recife	no	no	yes	14:25:00	14:05:00	20	59	female	married	21	> 4 years	2	no	housewife	no	0	0	0	0	0	< 1 USD/month	1	4	9999	9999	yes	yes	yes	yes	yes	yes	yes	no	no	no	no	no	no	no	no	yes	no	satisfactory	no	no	yes	yes	no	no
Recife	no	no	yes	14:34:00	14:26:00	8	43	female	single	15	> 4 years	2	no	housekeeper	yes	1388	788	2176	653.257	7.25841	> 2 USD/month	3	3	yes	1	yes	yes	yes	yes	yes	yes	yes	no	no	no	no	no	no	no	no	yes	no	satisfactory	yes	no	no	no	no	no
Recife	no	no	yes	09:30:00	09:25:00	5	31	male	married	19	> 4 years	2	no	security guard	yes	800	0	800	240.168	2.66853	> 2 USD/month	3	3	yes	6	yes	yes	no	no	yes	yes	yes	no	no	no	yes	no	no	no	no	yes	no	satisfactory	no	no	no	yes	no	no
Recife	no	no	yes	10:37:00	10:27:00	10	60	male	married	12	> 4 years	2	no	doorman	yes	1300	0	1300	390.273	2.16818	> 2 USD/month	3	6	no	9999	yes	yes	yes	yes	yes	yes	yes	no	yes	no	no	no	no	no	no	yes	no	satisfactory	no	yes	no	no	no	no
Recife	no	no	yes	08:08:00	07:58:00	10	73	female	married	16	> 4 years	2	no	seamstress	no	0	6000	6000	1801.26	15.0105	> 2 USD/month	3	4	9999	9999	no	no	I don't know	no	yes	yes	yes	no	yes	yes	no	no	no	no	no	yes	no	satisfactory	yes	no	no	no	no	no
Recife	no	no	yes	08:30:00	08:25:00	5	36	female	single	18	> 4 years	2	no	student	no	0	3000	3000	900.63	3.75263	> 2 USD/month	3	8	9999	9999	yes	yes	no	no	yes	yes	yes	no	no	no	no	no	no	no	no	yes	no	satisfactory	yes	no	no	no	no	no
Recife	no	no	yes	08:48:00	08:35:00	13	49	female	married	33	> 4 years	2	yes	teacher	yes	4300	0	4300	1290.9	14.3434	> 2 USD/month	3	3	yes	1	yes	yes	no	no	yes	yes	yes	no	no	no	no	no	no	no	no	yes	no	satisfactory	yes	no	no	no	no	no
Recife	no	no	yes	09:00:00	08:55:00	5	17	female	single	16	> 4 years	2	no	student	no	0	780	780	234.164	0.975683	< 1 USD/month	1	8	9999	9999	no	no	I don't know	no	yes	yes	yes	no	no	no	no	no	no	no	no	yes	no	satisfactory	yes	no	no	no	no	no
Recife	no	no	yes	10:33:00	10:27:00	6	37	female	married	0	≤ 4 years	1	no	housekeeper	yes	45	157	202	60.6424	0.673805	< 1 USD/month	1	3	yes	3	yes	yes	yes	yes	yes	yes	yes	no	no	no	no	no	no	no	no	yes	no	satisfactory	no	no	no	yes	no	no
Recife	no	no	yes	10:45:00	10:37:00	8	37	female	married	18	> 4 years	2	no	cashier	no	0	0	0	0	0	< 1 USD/month	1	3	9999	9999	yes	yes	yes	yes	yes	yes	yes	no	no	no	no	no	no	no	no	yes	no	satisfactory	yes	no	no	no	no	no
Recife	no	no	yes	11:15:00	11:09:00	6	58	female	married	19	> 4 years	2	no	housekeeper	yes	600	3000	3600	1080.76	5.14646	> 2 USD/month	3	7	no	9999	no	no	yes	yes	yes	yes	yes	no	no	no	no	no	no	no	no	yes	no	satisfactory	yes	no	no	no	no	no
Recife	no	no	yes	11:30:00	11:23:00	7	26	female	single	24	> 4 years	2	no	administrator	no	0	5000	5000	1501.05	16.6783	> 2 USD/month	3	3	9999	9999	no	no	no	no	yes	yes	yes	no	no	no	no	no	no	no	no	yes	no	satisfactory	yes	no	no	no	no	no
Recife	no	no	yes	12:12:00	12:05:00	7	73	male	married	0	≤ 4 years	1	no	industrial worker	no	788	1516	2304	691.684	11.5281	> 2 USD/month	3	2	9999	9999	yes	yes	yes	yes	yes	yes	yes	no	no	no	no	no	no	no	no	yes	no	satisfactory	yes	no	no	no	no	no
Recife	no	no	yes	12:21:00	12:16:00	5	50	male	separeted	18	> 4 years	2	no	painter	no	870	3000	3870	1161.81	9.68178	> 2 USD/month	3	4	yes	6	no	no	yes	yes	yes	yes	yes	no	no	yes	no	no	no	no	no	yes	no	satisfactory	yes	no	no	no	no	no
Recife	no	no	yes	12:37:00	12:31:00	6	40	male	married	0	≤ 4 years	1	no	garbageman	no	0	0	0	0	0	< 1 USD/month	1	3	yes	6	yes	yes	yes	yes	no	no	yes	no	no	no	no	no	no	no	no	yes	no	satisfactory	yes	no	no	no	no	no
Recife	no	no	yes	14:16:00	14:05:00	11	38	male	separeted	15	> 4 years	2	no	freelancer	no	800	0	800	240.168	2.0014	1-2 USD/month	2	4	yes	4	yes	yes	yes	yes	yes	yes	yes	no	no	no	no	no	no	no	no	yes	no	satisfactory	yes	no	no	no	no	no
Recife	no	no	yes	14:24:00	14:18:00	6	55	female	single	25	> 4 years	2	no	seamstress	no	0	5000	5000	1501.05	25.0175	> 2 USD/month	3	2	9999	9999	yes	yes	yes	yes	yes	yes	yes	no	no	no	no	no	no	no	no	yes	no	satisfactory	yes	no	no	no	no	no
Recife	no	no	yes	10:14:00	10:05:00	9	44	female	divorced	19	> 4 years	2	no	merchant	yes	780	1200	1980	594.416	9.90693	> 2 USD/month	3	2	no	9999	yes	yes	yes	yes	yes	yes	yes	no	no	no	no	no	no	no	no	yes	no	satisfactory	yes	no	no	no	no	no
Recife	no	no	yes	10:33:00	10:28:00	5	42	female	single	20	> 4 years	2	no	telephone operator	yes	880	3200	4080	1224.86	20.4143	> 2 USD/month	3	2	no	9999	yes	yes	no	no	yes	yes	yes	no	no	no	no	no	no	no	no	yes	no	satisfactory	no	no	no	yes	no	no
Recife	no	no	yes	10:55:00	10:45:00	10	35	female	single	30	> 4 years	2	no	housekeeper	no	100	0	100	30.021	1.0007	1-2 USD/month	2	1	9999	9999	no	no	yes	yes	yes	yes	yes	no	no	no	yes	no	no	no	no	yes	no	satisfactory	yes	no	no	no	no	no
Recife	no	no	yes	16:10:00	16:05:00	5	57	female	married	26	> 4 years	2	no	freelancer	no	0	2000	2000	600.42	10.007	> 2 USD/month	3	2	9999	9999	I don't know	no	yes	yes	yes	yes	yes	no	no	no	no	no	no	no	no	yes	no	satisfactory	yes	no	no	no	no	no
Recife	no	no	yes	10:00:00	09:50:00	10	63	male	separeted	18	> 4 years	2	no	freelancer	yes	500	788	1288	386.671	6.44451	> 2 USD/month	3	2	no	3	yes	yes	yes	yes	yes	yes	yes	no	no	no	yes	no	no	no	no	yes	no	satisfactory	no	no	no	yes	no	no
Recife	no	no	yes	11:08:00	11:01:00	7	52	male	single	8	> 4 years	2	no	agriculturist	yes	1000	3000	4000	1200.84	10.007	> 2 USD/month	3	4	no	9999	yes	yes	yes	yes	yes	yes	no	no	no	no	no	yes	no	yes	no	no	yes	unsatisfactory	no	yes	no	no	no	no
Recife	no	no	yes	11:36:00	11:32:00	4	51	female	married	8	> 4 years	2	yes	housewife	no	0	800	800	240.168	1.60112	1-2 USD/month	2	5	9999	9999	yes	yes	yes	yes	yes	yes	yes	no	no	no	no	no	no	no	no	yes	no	satisfactory	no	no	no	yes	no	no
Recife	no	no	yes	11:45:00	11:41:00	4	45	female	married	44	> 4 years	2	yes	psychologist	yes	5000	2000	7000	2101.47	35.0245	> 2 USD/month	3	2	no	9999	no	no	yes	yes	yes	yes	yes	no	no	no	no	no	no	no	no	yes	no	satisfactory	yes	no	no	no	no	no
Recife	no	no	yes	12:00:00	11:55:00	5	23	female	married	23	> 4 years	2	no	freelancer	yes	2500	788	3288	987.091	10.9677	> 2 USD/month	3	3	no	9999	I don't know	no	yes	yes	yes	yes	yes	no	no	no	no	no	no	no	no	yes	no	satisfactory	yes	no	no	no	no	no
Recife	no	no	yes	12:26:00	12:07:00	19	43	female	married	21	> 4 years	2	yes	treasurer	no	1138	1100	2238	671.87	7.46523	> 2 USD/month	3	3	yes	13	no	no	yes	yes	I don't know	no	yes	no	no	no	no	no	no	no	no	yes	no	satisfactory	yes	yes	no	no	no	no
Recife	no	no	yes	11:38:00	11:31:00	7	36	female	married	20	> 4 years	2	no	agriculturist	yes	888	150	1038	311.618	2.07745	> 2 USD/month	3	5	yes	4	yes	yes	yes	yes	yes	yes	yes	no	no	yes	no	no	no	no	no	yes	no	satisfactory	yes	no	no	no	no	no
Recife	no	no	yes	11:48:00	11:42:00	6	28	male	single	23	> 4 years	2	no	carpenter	yes	1000	1000	2000	600.42	10.007	> 2 USD/month	3	2	no	9999	yes	yes	yes	yes	no	no	yes	no	no	no	no	no	no	no	no	yes	no	satisfactory	yes	no	no	no	no	no
[truncated: 113 more columns]

## Sheet: Lista
Cidade	simnão	simnãonãometratar	simnaonaoaplica	simnãolembronãoaplica	Sexo	Estadocivil	comotratatb	acontecerpararmedicação	informaçõesTB	sesimquemé	comopegouadoença	sesimqualmotivoprafalar	senãoqualmotivo	sesimporque	senãoporque	trazerpessoasatendimento	pessoastbfamília
					7	8	21	22	23	26	29	32	33	38	39	40	42
Recife	sim	sim	sim	sim	Masculino	Solteiro	Remédios anti-TB	O bacilo da TB ficará mais forte	Família	Membro da família	Convivendo com pessoa com TB	Eu não quero que eles se infectem/adoeçam	Não é da conta deles	O tratamento pode começar imediatamente	Não há nada que se possa fazer	Eu (paciente com TB)	Rejeição social
Manaus	não	não	não	não	Feminino	Casado/vivejunto	Boa alimentação	Eu não vou ficar curado	Amigos	Vizinho/Amigo	Eu herdei a TB	Eles já sabem	Eles vão me evitar	A pessoa pode ficar melhor	O tratamento é muito caro	O vizinho	Podem perder o emprego ou serem impedidas de frequentar a escola,
RJ	não sei	não sei	não se aplica	não lembro		Separado	Vida saudável	Nada acontecerá se eu estiver me sentindo bem	Televisão	Colega de trabalho	Foi coisa de Deus	Eu não tenho nada a esconder	Eles vão lidar comigo de forma diferente	Pode-se evitar que infectem outras pessoas	A pessoa pode perder o emprego ou ser impedida de frequentar a escola	Outra pessoa da família	Não poderem pagar pelo tratamento
		se não me tratar, sim		não se aplica		Divorciado	Repouso	Eu vou morrer	Propaganda	Empregada doméstica	Trabalhando muito	Outro	Eles vão me responsabilizar se ficarem doentes	Ela pode estar com a infecção e evitar o adoecimento	Medo da reação dos amigos ou da família	Eles viriam por eles mesmos	Preocupação com a saúde delas
						Viúvo	Vitaminas	Não sei	Médico	Colega de escola	Fumando	Não se aplica	Não é importante dizer	Não sei	Já foram vacinados contra a TB	Não sei	Eu não estou preocupada
							Fazendo acompanhamento médico	Outros	Enfermeiro	Outros	Bebendo álcool		Outros	Outros	Não sei	Outros	Não poderem cuidar de mim
							Outros		Agente comunitário de saúde	Não se aplica	Vivendo em ambiente poluído		Não se aplica	Não se aplica	Outros	Não se aplica	Medo que eles morram
									Aconselhamento no local do atendimento		Não me alimentando adequadamente (alimentação ruim)				Não se aplica		Outros
									Internet		Usando utensílio de uso pessoal do caso índice
									Escola		Outros
		Policlínicas Recife							Outros		Não sei
		Gouveia de Barros									Não se aplica
		Lessa de Andrade
		Albert Sabin
		Agamenon Magalhães
